# Supplementary material for: Simple mathematical model for predicting COVID-19 outbreaks in Japan based on epidemic waves with a cyclical trend
Source: Springer Nature journal article supplement (doi:10.1186/s12879-024-09354-5), 2024-05-09
Supplement: MOESM2 [file 27072606]

**Additional file 1.**

**S1. Table. Coefficients used in predicting the slope of the rising line**

|                                                       |                           | 1 <sup>st</sup> wave | 2 <sup>nd</sup> wave | 3 <sup>rd</sup> wave | 4 <sup>th</sup> wave | 5 <sup>th</sup> wave | 6 <sup>th</sup> wave | 7 <sup>th</sup> wave |
|-------------------------------------------------------|---------------------------|----------------------|----------------------|----------------------|----------------------|----------------------|----------------------|----------------------|
| Epidemic Period                                       | Rize                      | 28                   | 133                  | 266                  | 413                  | 532                  | 686                  | 889                  |
|                                                       | Peak<br>(b <sub>i</sub> ) | 91                   | 207                  | 367                  | 483                  | 588                  | 756                  | 959                  |
| Slope of the rising line                              |                           | 345                  | 787                  | 2,366                | 3,879                | 21,538               | 69,103               | 229,523              |
| Total number of infected persons<br>(a <sub>i</sub> ) |                           | 16,494               | 62,843               | 352,881              | 351,203              | 937,559              | 4,300,000            | 14,000,000           |
| Adjustment<br>(c <sub>i</sub> )                       |                           | 8                    | 9                    | 10                   | 11                   | 12                   | 11                   | 12                   |
